# Supplementary material
Source: PubMed Central journal article supplement (PMC373489)

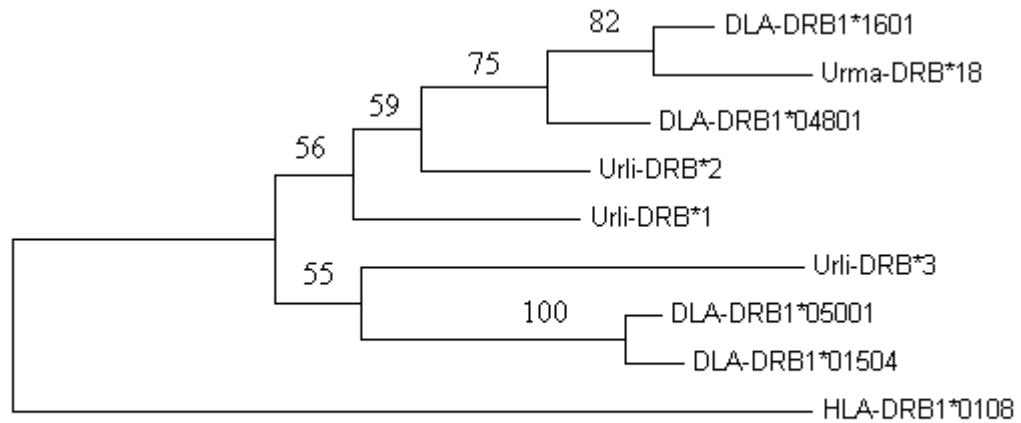

0.02

Supplement: pnas_0306582101_3.pdf [file pnas_0306582101_3.pdf]

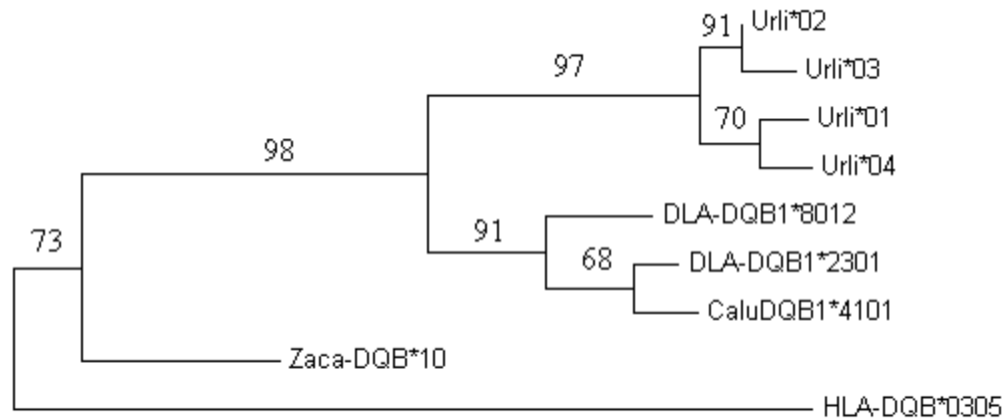

Supplement: pnas_0306582101_5.pdf [file pnas_0306582101_5.pdf]
